# Supplementary material
Source: publisher figshare collection journal article supplement (https://sage.figshare.com/ndownloader/files/14862230)
Supplement: Supplementary file 1 [file 14862230]

## Supplementary data 4. Evidence profile and summary of findings

**Table 1. Evidence profile and summary of findings of EVAR versus OSR for AravastuAAA repair in patients younger than 80 years with low surgical risk**

| Quality assessment                                                                                                                           |                   |              |                      |                      |                      |                          | № of patients                                                                                         |                  | Effect                        |                                                      | Quality       | Importance |
|----------------------------------------------------------------------------------------------------------------------------------------------|-------------------|--------------|----------------------|----------------------|----------------------|--------------------------|-------------------------------------------------------------------------------------------------------|------------------|-------------------------------|------------------------------------------------------|---------------|------------|
| № of studies                                                                                                                                 | Study design      | Risk of bias | Inconsistency        | Indirectness         | Imprecision          | Other considerations     | EVAR                                                                                                  | OSR              | Relative (95% CI)             | Absolute (95% CI)                                    |               |            |
| Short term mortality (30-day or in-hospital) (excluding participants who died before surgery and those who did not undergo any intervention) |                   |              |                      |                      |                      |                          |                                                                                                       |                  |                               |                                                      |               |            |
| 4                                                                                                                                            | randomised trials | not serious  | not serious          | not serious          | not serious          | not serious <sup>a</sup> | 20/1362 (1.5%)                                                                                        | 58/1361 (4.3%)   | <b>OR 0.33</b> (0.20 to 0.55) | <b>28 fewer per 1000</b> (from 19 fewer to 34 fewer) | ⊕⊕⊕⊕ HIGH     | CRITICAL   |
| Long term mortality (beyond 4 years, ITT analysis)                                                                                           |                   |              |                      |                      |                      |                          |                                                                                                       |                  |                               |                                                      |               |            |
| 3                                                                                                                                            | randomised trials | not serious  | not serious          | not serious          | not serious          | not serious <sup>a</sup> | 464/1243 (37.3%)                                                                                      | 470/1241 (37.9%) | <b>OR 0.98</b> (0.83 to 1.15) | <b>5 fewer per 1000</b> (from 33 more to 43 fewer)   | ⊕⊕⊕⊕ HIGH     | CRITICAL   |
| Health-related quality of life                                                                                                               |                   |              |                      |                      |                      |                          |                                                                                                       |                  |                               |                                                      |               |            |
| 3                                                                                                                                            | randomised trials | not serious  | not serious          | serious <sup>b</sup> | serious <sup>c</sup> | none                     | The authors concluded that health-related quality of life was comparable between EVAR and OSR groups. |                  |                               |                                                      | ⊕⊕○○ LOW      | IMPORTANT  |
| Long term reintervention (beyond 4 years)                                                                                                    |                   |              |                      |                      |                      |                          |                                                                                                       |                  |                               |                                                      |               |            |
| 3                                                                                                                                            | randomised trials | not serious  | serious <sup>d</sup> | not serious          | not serious          | not serious <sup>a</sup> | 291/1243 (23.4%)                                                                                      | 163/1241 (13.1%) | <b>OR 1.98</b> (1.12 to 3.51) | <b>99 more per 1000</b> (from 13 more to 215 more)   | ⊕⊕⊕○ MODERATE | IMPORTANT  |
| Endoleaks after surgery (Type I)                                                                                                             |                   |              |                      |                      |                      |                          |                                                                                                       |                  |                               |                                                      |               |            |
| 3                                                                                                                                            | randomised trials | not serious  | not serious          | serious <sup>e</sup> | not serious          | none                     | 49/852 (5.8%)                                                                                         | not reported     | not estimable                 | not estimable                                        | ⊕⊕⊕○ MODERATE | IMPORTANT  |

| Quality assessment                 |                   |              |               |                      |             |                      | № of patients   |              | Effect            |                   | Quality          | Importance |
|------------------------------------|-------------------|--------------|---------------|----------------------|-------------|----------------------|-----------------|--------------|-------------------|-------------------|------------------|------------|
| № of studies                       | Study design      | Risk of bias | Inconsistency | Indirectness         | Imprecision | Other considerations | EVAR            | OSR          | Relative (95% CI) | Absolute (95% CI) |                  |            |
| Endoleaks after surgery (Type II)  |                   |              |               |                      |             |                      |                 |              |                   |                   |                  |            |
| 3                                  | randomised trials | not serious  | not serious   | serious <sup>e</sup> | not serious | none                 | 118/852 (13.8%) | not reported | not estimable     | not estimable     | ⊕⊕⊕○<br>MODERATE | IMPORTANT  |
| Endoleaks after surgery (Type III) |                   |              |               |                      |             |                      |                 |              |                   |                   |                  |            |
| 3                                  | randomised trials | not serious  | not serious   | serious <sup>e</sup> | not serious | none                 | 8/529 (1.5%)    | not reported | not estimable     | not estimable     | ⊕⊕⊕○<br>MODERATE | IMPORTANT  |

**CI:** Confidence interval; **OR:** Odds ratio

a. The estimated relative risk for this outcome was provided by the systematic review of Paravastu et al 2014. The systematic review did not explain the reasons for calculating odds ratios rather than risk ratios. However, the method for calculating the relative effect does not affect the certainty of the results.

b. The time frame of data collection differs between studies

c. Only one study presented a full data set, precluding the calculation of a pooled estimate

d. There was moderate-to-high heterogeneity among trials. The likelihood of drawing correct conclusions decreases with increasing heterogeneity (test of heterogeneity I<sup>2</sup> = 85%).

e. The time of data collection was not specified. It varies among the studies from 30 days to 2 years.

**Table 2. Evidence profile and summary of findings of EVAR versus OSR for AAA repair in patients age 80 years and older with low surgical risk**

| Quality assessment                                                                 |               |              |               |                      |                      |                      | № of patients   |                 | Effect                              |                                               | Quality       | Importance |
|------------------------------------------------------------------------------------|---------------|--------------|---------------|----------------------|----------------------|----------------------|-----------------|-----------------|-------------------------------------|-----------------------------------------------|---------------|------------|
| № of studies                                                                       | Study design  | Risk of bias | Inconsistency | Indirectness         | Imprecision          | Other considerations | EVAR            | OSR             | Relative (95% CI)                   | Absolute (95% CI)                             |               |            |
| Short term mortality (30-day or in-hospital)                                       |               |              |               |                      |                      |                      |                 |                 |                                     |                                               |               |            |
| 8                                                                                  | observational | not serious  | not serious   | not serious          | not serious          | none                 | 148/7063 (2.1%) | 604/6838 (8.8%) | RR 0.25 (0.21 to 0.31)              | 66 fewer per 1000 (from 61 fewer to 70 fewer) | ⊕⊕○○ LOW      | CRITICAL   |
| Long term mortality (up to 4 years) open surgery repair versus endovascular repair |               |              |               |                      |                      |                      |                 |                 |                                     |                                               |               |            |
| 6                                                                                  | observational | not serious  | not serious   | serious <sup>a</sup> | serious <sup>b</sup> | none                 | not reported    | not reported    | RR 1.10 <sup>a</sup> (0.77 to 1.57) | not estimable                                 | ⊕○○○ VERY LOW | CRITICAL   |
| Endoleaks after surgery (Type I)                                                   |               |              |               |                      |                      |                      |                 |                 |                                     |                                               |               |            |
| 1                                                                                  | observational | not serious  | not serious   | not serious          | serious <sup>c</sup> | none                 | 1/33 (3.0%)     | not reported    | not estimable                       | not estimable                                 | ⊕○○○ VERY LOW | IMPORTANT  |
| Endoleaks after surgery (Type II)                                                  |               |              |               |                      |                      |                      |                 |                 |                                     |                                               |               |            |
| 1                                                                                  | observational | not serious  | not serious   | not serious          | serious <sup>c</sup> | none                 | 5/33 (15.0%)    | not reported    | not estimable                       | not estimable                                 | ⊕○○○ VERY LOW | IMPORTANT  |

**CI:** Confidence interval; **RR:** Risk ratio

a. The reported RR compared open surgery repair versus endovascular repair.

b. Wide confidence interval is indicative of a less precise estimate.

c. Only one study with a small sample size.

**Table 3. Evidence profile and summary of findings of EVAR versus OSR for AAA repair in patients with high surgical risk as long as they have friendly anatomy, regardless of the age**

| Quality assessment                           |               |                      |               |                      |             |                      | № of patients    |                 | Effect                        |                                                      | Quality          | Importance |
|----------------------------------------------|---------------|----------------------|---------------|----------------------|-------------|----------------------|------------------|-----------------|-------------------------------|------------------------------------------------------|------------------|------------|
| № of studies                                 | Study design  | Risk of bias         | Inconsistency | Indirectness         | Imprecision | Other considerations | EVAR             | OSR             | Relative (95% CI)             | Absolute (95% CI)                                    |                  |            |
| Short term mortality (30-day or in-hospital) |               |                      |               |                      |             |                      |                  |                 |                               |                                                      |                  |            |
| 1                                            | observational | serious <sup>a</sup> | not serious   | serious <sup>b</sup> | not serious | none                 | 210/15807 (1.3%) | 199/5308 (3.7%) | <b>OR 0.30</b> (0.25 to 0.38) | <b>26 fewer per 1000</b> (from 23 fewer to 28 fewer) | ⊕○○○<br>VERY LOW | CRITICAL   |

**CI:** Confidence interval; **OR:** Odds ratio

a. Important differences in patient characteristics between OSR and EVAR for AAA were observed (distribution of total sample, ASA classification).

b. High percentage of previous cardiac surgery both in EVAR (21.8%) and OSR (23.6%). In addition, a small proportion of the population (0.1 %) was low surgical risk.

**Table 4. Evidence profile and summary of findings of EVAR versus OSR for AAA repair in patients with hostile anatomy regardless of the surgical risk and age**

| Quality assessment                           |               |              |               |                      |                      |                      | № of patients   |                  | Effect                         |                                                    | Quality          | Importance |
|----------------------------------------------|---------------|--------------|---------------|----------------------|----------------------|----------------------|-----------------|------------------|--------------------------------|----------------------------------------------------|------------------|------------|
| № of studies                                 | Study design  | Risk of bias | Inconsistency | Indirectness         | Imprecision          | Other considerations | Hostile anatomy | Friendly anatomy | Relative (95% CI)              | Absolute (95% CI)                                  |                  |            |
| Short term mortality (30-day)                |               |              |               |                      |                      |                      |                 |                  |                                |                                                    |                  |            |
| 4                                            | observational | not serious  | not serious   | not serious          | serious <sup>a</sup> | none                 | 11/487 (2.3%)   | 13/640 (2.0%)    | <b>OR 1.02</b> (0.42 to 2.49)  | <b>0 fewer per 1000</b> (from 12 fewer to 29 more) | ⊕○○○<br>VERY LOW | CRITICAL   |
| Long term reintervention (at 1 year)         |               |              |               |                      |                      |                      |                 |                  |                                |                                                    |                  |            |
| 3                                            | observational | not serious  | not serious   | serious <sup>b</sup> | not serious          | none                 | 21/427 (4.9%)   | 28/553 (5.1%)    | <b>OR 0.99</b> (0.55 to 1.79)  | <b>0 fewer per 1000</b> (from 22 fewer to 37 more) | ⊕○○○<br>VERY LOW | IMPORTANT  |
| Endoleaks after surgery (Type I) (at 1 year) |               |              |               |                      |                      |                      |                 |                  |                                |                                                    |                  |            |
| 2                                            | observational | not serious  | not serious   | serious <sup>b</sup> | serious <sup>a</sup> | none                 | 20/205 (9.8%)   | 3/210 (1.4%)     | <b>OR 4.56</b> (1.43 to 14.55) | <b>48 more per 1000</b> (from 6 more to 160 more)  | ⊕○○○<br>VERY LOW | IMPORTANT  |

**CI:** Confidence interval; **OR:** Odds ratio

a. Large confidence interval.

b. Data collection not clearly reported.

**Table 5. Evidence profile and summary of findings of EVAR versus OSR for patients' preferences**

| Quality assessment     |               |              |               |                          |                      |                      | № of patients                                                                                                                                                                                                                                                                                                                          |     | Effect            |                   | Quality  | Importance |
|------------------------|---------------|--------------|---------------|--------------------------|----------------------|----------------------|----------------------------------------------------------------------------------------------------------------------------------------------------------------------------------------------------------------------------------------------------------------------------------------------------------------------------------------|-----|-------------------|-------------------|----------|------------|
| № of studies           | Study design  | Risk of bias | Inconsistency | Indirectness             | Imprecision          | Other considerations | EVAR                                                                                                                                                                                                                                                                                                                                   | OSR | Relative (95% CI) | Absolute (95% CI) |          |            |
| T reatment preferences |               |              |               |                          |                      |                      |                                                                                                                                                                                                                                                                                                                                        |     |                   |                   |          |            |
| 2                      | observational | not serious  | not serious   | not serious <sup>a</sup> | serious <sup>b</sup> | none                 | - Patients who expressed a preference for OSR (13 %, 7/56) were significantly younger (mean age 62.3 years; than those preferring EVAR (mean age 74.0 years).<br><br>- 46% (77/167) of participants showed a preference for EVAR, followed by 20% (34/167) without any preference, 18% (30/167) OSR, and 14% (23/167) whatever option. |     | ⊕○○○<br>VERY LOW  |                   | CRITICAL |            |

**CI:** Confidence interval

a. One study only includes male patients, whereas the other study includes male and few female patients.

b. Small sample size in both studies.

**Table 6. Evidence profile and summary of findings of EVAR versus OSR for cost-effectiveness data**

| Quality assessment           |                                                  |             |                      |              |                      |                  | Summary of resources and costs |                    |               | Quality     |
|------------------------------|--------------------------------------------------|-------------|----------------------|--------------|----------------------|------------------|--------------------------------|--------------------|---------------|-------------|
| Nº. of studies               | Study design                                     | Limitations | Inconsistency        | Indirectness | Imprecision          | Publication bias | Incremental cost               | Incremental effect | ICER (£/QALY) |             |
| ICER scenario 1 (£ per QALY) |                                                  |             |                      |              |                      |                  |                                |                    |               |             |
| 1                            | Systematic review of cost–effectiveness analyses | Not serious | serious <sup>a</sup> | Not serious  | Serious <sup>b</sup> |                  | £4014                          | -0.02              | D-            | ⊕⊕○○<br>LOW |
|                              |                                                  |             |                      |              |                      |                  | £3181                          | 0.0012             | £2,845,315    |             |
|                              |                                                  |             |                      |              |                      |                  | £-1852                         | 0.05               | D+            |             |
|                              |                                                  |             |                      |              |                      |                  | £2086                          | -0.01              | D-            |             |
| ICER scenario 2 (£ per QALY) |                                                  |             |                      |              |                      |                  |                                |                    |               |             |
| 1                            | Systematic review of cost–effectiveness analyses | Not serious | Serious <sup>a</sup> | Not serious  | Serious <sup>c</sup> |                  | £3017                          | 0.04               | £73,035       | ⊕⊕○○<br>LOW |
|                              |                                                  |             |                      |              |                      |                  | £2608                          | 0.04               | £61,462       |             |
|                              |                                                  |             |                      |              |                      |                  | £-2362                         | 0.08               | D+            |             |
|                              |                                                  |             |                      |              |                      |                  | £1485                          | -0.01              | D-            |             |

**ICER:** Incremental cost-effectiveness ratio. **D-:** Dominated; more costly and less effective strategy. **D+:** Dominant; less costly and more effective strategy.

a. Differences in populations and settings.

b. EVAR was considered dominant in two studies, dominated in one study and showed a very high ICER in one study.

c. EVAR was considered dominant in one study, dominated in one study and showed a very high ICER in two studies.
